# Supplementary material
Source: Research Square preprint supplement (doi:10.21203/rs.3.rs-9225831/v1)
Supplement: Supplementary file 1 [file 29324af2d433f5401cb0a26e.docx]

Single-Crystal X-ray Diffraction Study of 2:1 Inclusion Complexes of [2]Biphenyl-Extended Pillar[6]arene with Dichloromethane, 3,5-Lutidine and Ethyl Acetate

**Mickey Vinodh, Randa Abd Almoaeen, Fatemeh H. Alipour, and Talal F. Al-Azemi***

*Chemistry Department, Kuwait University, P.O. Box 5969, Safat 13060, Kuwait*

*e-mail: t.alazemi@ku.edu.kw*

**Table of contents**

| **Table S1** Summary of the key crystallographic parameters of **BP8.2DCM, BP8.2Lut** & **BP8.2EtOAc** | S2 |
| --- | --- |
| **Fig. S1** Thermal ellipsoid representation ( 30% probability) of **BP8.2DCM** crystal | S3 |
| **Fig. S2** Thermal ellipsoid representation ( 30% probability) of **BP8.2Lut** crystal | S3 |
| **Fig. S3** Thermal ellipsoid representation ( 30% probability) of **BP8.2EtOac** crystal | S4 |
| **Fig. S4** Packing pattern of **BP8.2DCM** crystals | S4 |
| **Fig. S5** Packing pattern of **BP8.2Lut** crystals | S5 |
| **Fig. S6** Packing pattern of **BP8.2EtOAc** crystals | S5 |
| checkCif report of BP8.2DCM | S6 |
| checkCif report of BP8.2Lut | S8 |
| checkCif report of BP8.2EtOAc | S10 |

**Table S1.** Summary of the key crystallographic parameters of **BP8.2DCM, BP8.2Lut & BP8.2EtOAc**

| Crystal sample | **BP8.2DCM** | **BP8.2Lut** | **BP8.2EtOAc** |
| --- | --- | --- | --- |
| Chemical formula | [C64H64Cl4O8](BP8_2DCM%20_chemical_formula_sum) | [C76H78N2O8](BP8_2Lut%20_chemical_formula_sum) | [C70H76O12](BP8_2EtOAc%20_chemical_formula_sum) |
| Mr | [1102.95](BP8_2DCM%20_chemical_formula_weight) | [1147.40](BP8_2Lut%20_chemical_formula_weight) | [1109.30](BP8_2EtOAc%20_chemical_formula_weight) |
| Crystal system, space group | [Triclinic](BP8_2DCM%20_space_group_crystal_system), *P*-1 | [Triclinic](BP8_2Lut%20_space_group_crystal_system), *P*-1 | [Triclinic](BP8_2EtOAc%20_space_group_crystal_system), *P*-1 |
| Temperature (K) | [293](BP8_2DCM%20_cell_measurement_temperature) | [293](BP8_2Lut%20_cell_measurement_temperature) | [293](BP8_2EtOAc%20_cell_measurement_temperature) |
| a, b, c (Å) | [10.929 (8)](BP8_2DCM%20_cell_length_a), [12.083 (8)](BP8_2DCM%20_cell_length_b), [12.718 (9)](BP8_2DCM%20_cell_length_c) | [11.4952 (12)](BP8_2Lut%20_cell_length_a), [11.5353 (11)](BP8_2Lut%20_cell_length_b), [13.4512 (14)](BP8_2Lut%20_cell_length_c) | [11.1746 (7)](BP8_2EtOAc%20_cell_length_a), [11.9041 (9)](BP8_2EtOAc%20_cell_length_b), [12.9118 (9)](BP8_2EtOAc%20_cell_length_c) |
| α, β, γ (°) | [74.983 (9)](BP8_2DCM%20_cell_angle_alpha), [72.896 (10)](BP8_2DCM%20_cell_angle_beta), [80.531 (11)](BP8_2DCM%20_cell_angle_gamma) | [72.721 (5)](BP8_2Lut%20_cell_angle_alpha), [69.872 (5)](BP8_2Lut%20_cell_angle_beta), [79.523 (6)](BP8_2Lut%20_cell_angle_gamma) | [74.735 (5)](BP8_2EtOAc%20_cell_angle_alpha), [71.166 (5)](BP8_2EtOAc%20_cell_angle_beta), [79.923 (6)](BP8_2EtOAc%20_cell_angle_gamma) |
| V (Å3) | [1543.3 (19)](BP8_2DCM%20_cell_volume) | [1592.8 (3)](BP8_2Lut%20_cell_volume) | [1560.63 (19)](BP8_2EtOAc%20_cell_volume) |
| Z | [1](BP8_2DCM%20_cell_formula_units_Z) | [1](BP8_2Lut%20_cell_formula_units_Z) | [1](BP8_2EtOAc%20_cell_formula_units_Z) |
| Radiation type | [Mo *K*α](BP8_2DCM%20_diffrn_radiation_type) | [Mo *K*α](BP8_2Lut%20_diffrn_radiation_type) | [Mo *K*α](BP8_2EtOAc%20_diffrn_radiation_type) |
| µ (mm−1) | [0.24](BP8_2DCM%20_exptl_absorpt_coefficient_mu) | [0.08](BP8_2Lut%20_exptl_absorpt_coefficient_mu) | [0.08](BP8_2EtOAc%20_exptl_absorpt_coefficient_mu) |
| Crystal size (mm) | [0.20](BP8_2DCM%20_exptl_crystal_size_max) × [0.16](BP8_2DCM%20_exptl_crystal_size_mid) × [0.07](BP8_2DCM%20_exptl_crystal_size_min) | [0.20](BP8_2Lut%20_exptl_crystal_size_max) × [0.17](BP8_2Lut%20_exptl_crystal_size_mid) × [0.11](BP8_2Lut%20_exptl_crystal_size_min) | [0.20](BP8_2EtOAc%20_exptl_crystal_size_max) × [0.14](BP8_2EtOAc%20_exptl_crystal_size_mid) × [0.05](BP8_2EtOAc%20_exptl_crystal_size_min) |
| Diffractometer | Rigaku R-AXIS RAPID | Rigaku R-AXIS RAPID | Rigaku R-AXIS RAPID |
| Absorption correction | Multi-scan  ABSCOR (Rigaku, 1995) | Absorption correction  ABSCOR (Rigaku, 1995) | Absorption correction  ABSCOR (Rigaku, 1995) |
| Tmin, Tmax | [0.471](BP8_2DCM%20_exptl_absorpt_correction_T_min), [0.986](BP8_2DCM%20_exptl_absorpt_correction_T_max) | [0.536](BP8_2Lut%20_exptl_absorpt_correction_T_min), [0.991](BP8_2Lut%20_exptl_absorpt_correction_T_max) | [0.658](BP8_2EtOAc%20_exptl_absorpt_correction_T_min), [0.989](BP8_2EtOAc%20_exptl_absorpt_correction_T_max) |
| No. of measured, independent & observed [I > 2σ(I)] reflections | [10965](BP8_2DCM%20_diffrn_reflns_number), [5202](BP8_2DCM%20_reflns_number_total), [2180](BP8_2DCM%20_reflns_number_gt) | [16898](BP8_2Lut%20_diffrn_reflns_number), [5476](BP8_2Lut%20_reflns_number_total), [3221](BP8_2Lut%20_reflns_number_gt) | [14690](BP8_2EtOAc%20_diffrn_reflns_number), [5326](BP8_2EtOAc%20_reflns_number_total), [3372](BP8_2EtOAc%20_reflns_number_gt) |
| Rint | [0.094](BP8_2DCM%20_diffrn_reflns_av_R_equivalents) | [0.049](BP8_2Lut%20_diffrn_reflns_av_R_equivalents) | [0.041](BP8_2EtOAc%20_diffrn_reflns_av_R_equivalents) |
| (sin θ/λ)max (Å−1) | 0.595 | 0.595 | 0.595 |
| R[F2 > 2σ(F2)], wR(F2), S | [0.080](BP8_2DCM%20_refine_ls_R_factor_gt), [0.268](BP8_2DCM%20_refine_ls_wR_factor_ref), [0.96](BP8_2DCM%20_refine_ls_goodness_of_fit_ref) | [0.075](BP8_2Lut%20_refine_ls_R_factor_gt), [0.238](BP8_2Lut%20_refine_ls_wR_factor_ref), [1.03](BP8_2Lut%20_refine_ls_goodness_of_fit_ref) | [0.063](BP8_2EtOAc%20_refine_ls_R_factor_gt), [0.200](BP8_2EtOAc%20_refine_ls_wR_factor_ref), [1.02](BP8_2EtOAc%20_refine_ls_goodness_of_fit_ref) |
| No. of reflections | [5202](BP8_2DCM%20_refine_ls_number_reflns) | [5476](BP8_2Lut%20_refine_ls_number_reflns) | [5326](BP8_2EtOAc%20_refine_ls_number_reflns) |
| No. of parameters | [375](BP8_2DCM%20_refine_ls_number_parameters) | [394](BP8_2Lut%20_refine_ls_number_parameters) | [429](BP8_2EtOAc%20_refine_ls_number_parameters) |
| No. of restraints | [63](BP8_2DCM%20_refine_ls_number_restraints) | - | [191](BP8_2EtOAc%20_refine_ls_number_restraints) |
| H-atom treatment | Constrained | Constrained | Constrained |
| Δρmax, Δρmin (e Å−3) | [0.29](BP8_2DCM%20_refine_diff_density_max), [−0.20](BP8_2DCM%20_refine_diff_density_min) | [0.30](BP8_2Lut%20_refine_diff_density_max), [−0.27](BP8_2Lut%20_refine_diff_density_min) | [0.21](BP8_2EtOAc%20_refine_diff_density_max), [−0.26](BP8_2EtOAc%20_refine_diff_density_min) |


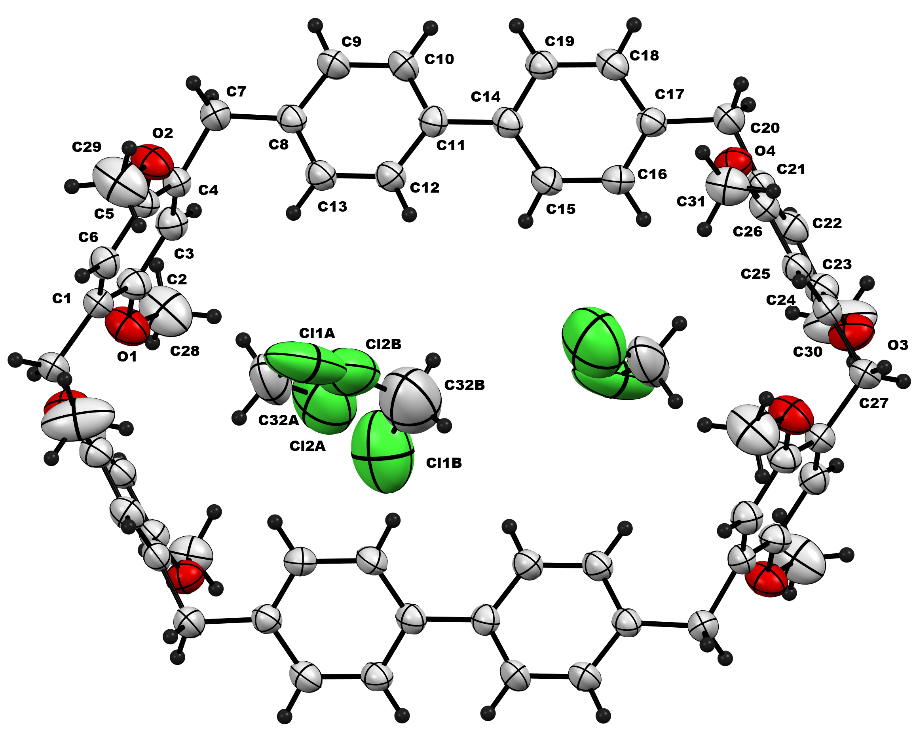


**Fig. S1** Thermal ellipsoid representation ( 30% probability) of **BP8.2DCM** crystal **(**Only Symmetry independent atoms are labelled).

**
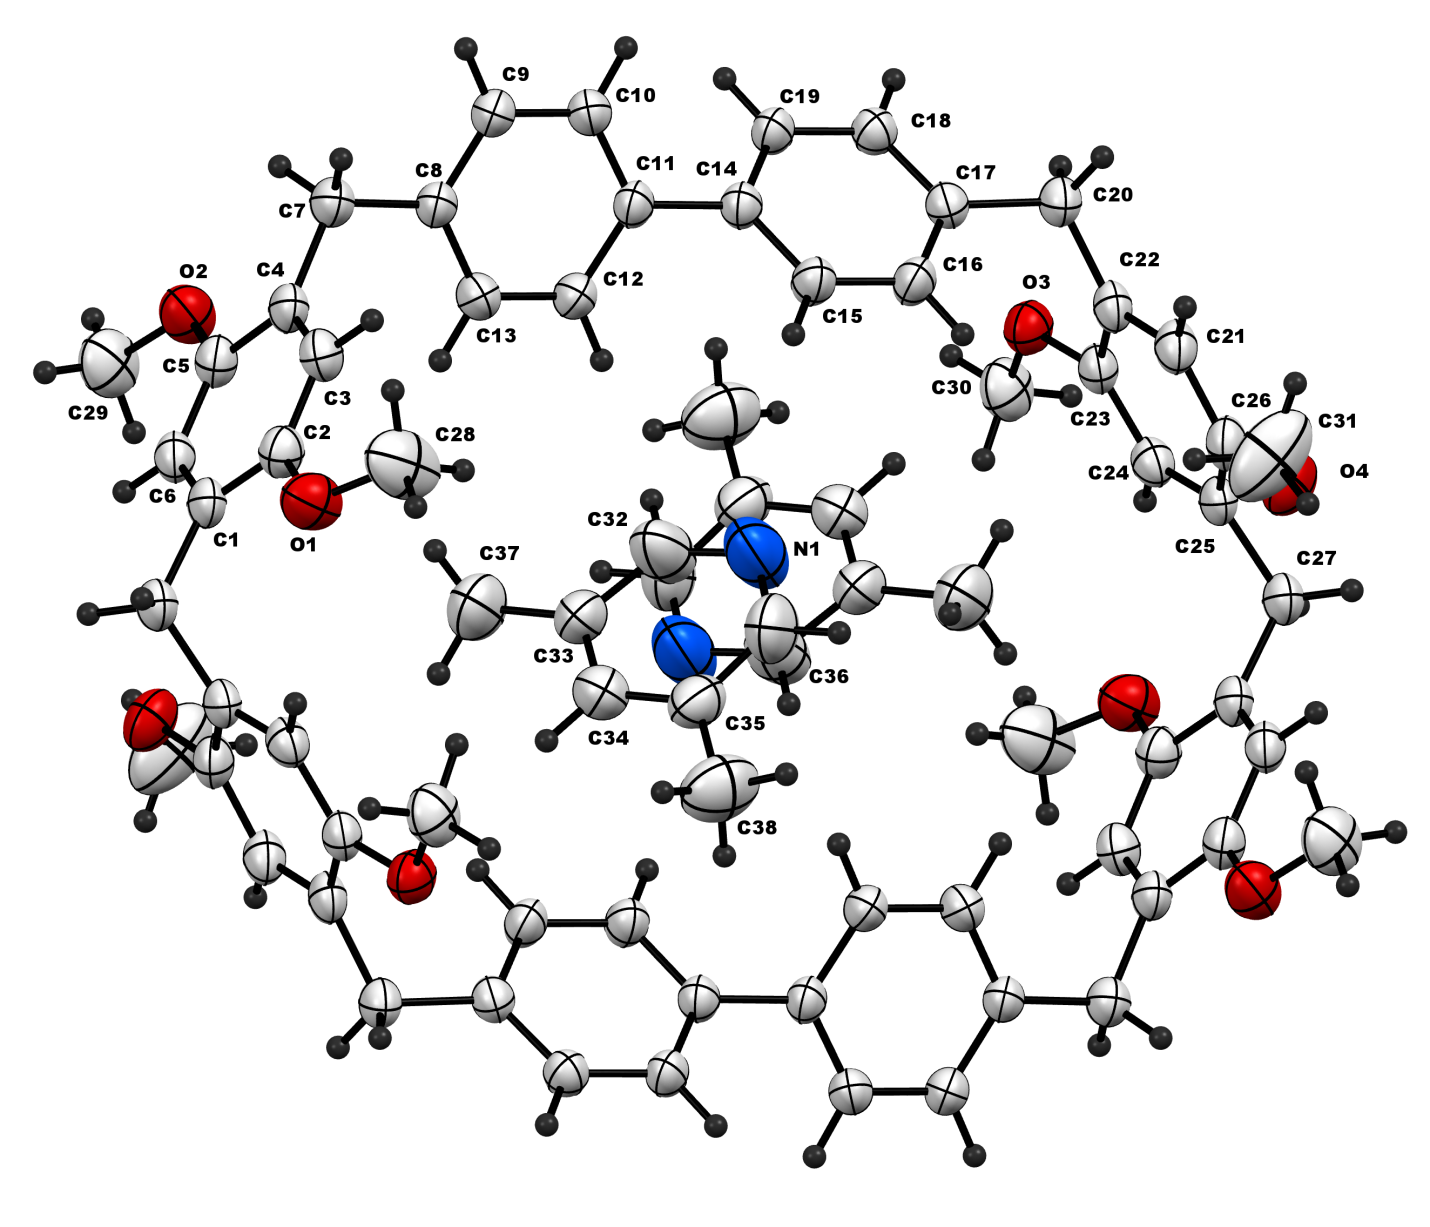
**

**Fig. S2** Thermal ellipsoid representation ( 30% probability) the asymmetric unit of **BP8.2Lut (**Only Symmetry independent atoms are labelled).


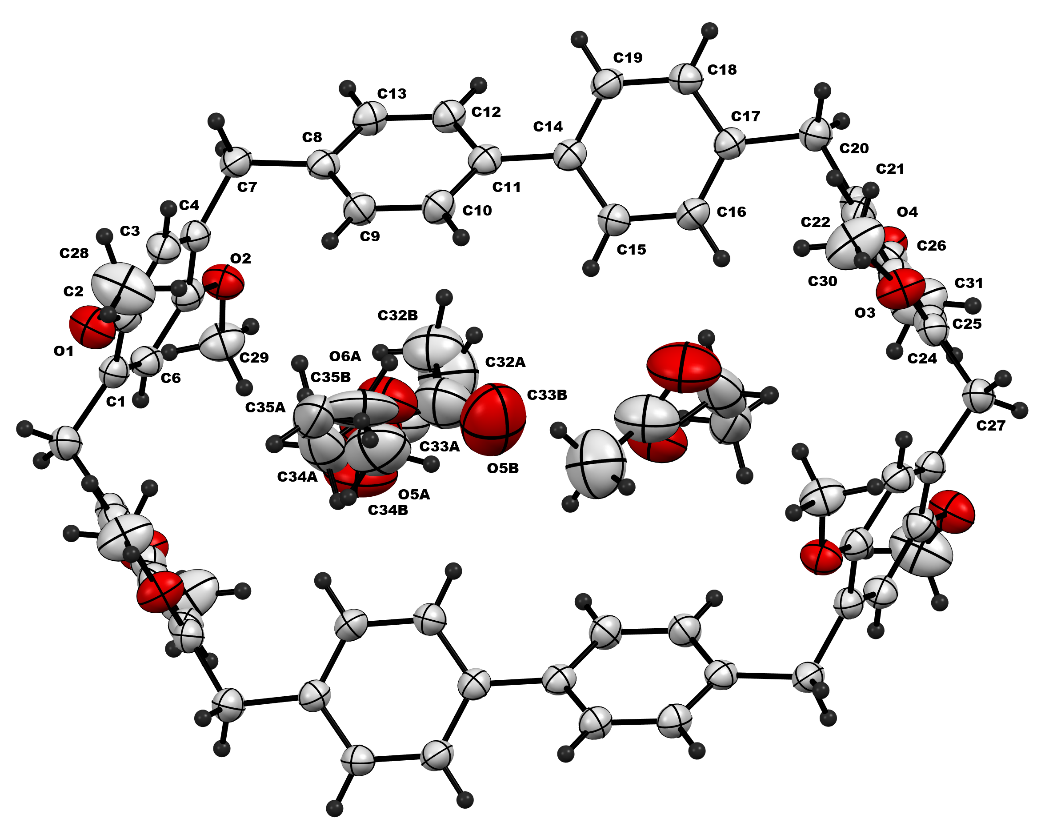


**Fig. S3** Thermal ellipsoid representation (30% probability) the asymmetric unit of **BP8.2EtOAc (**Only Symmetry independent atoms are labelled).


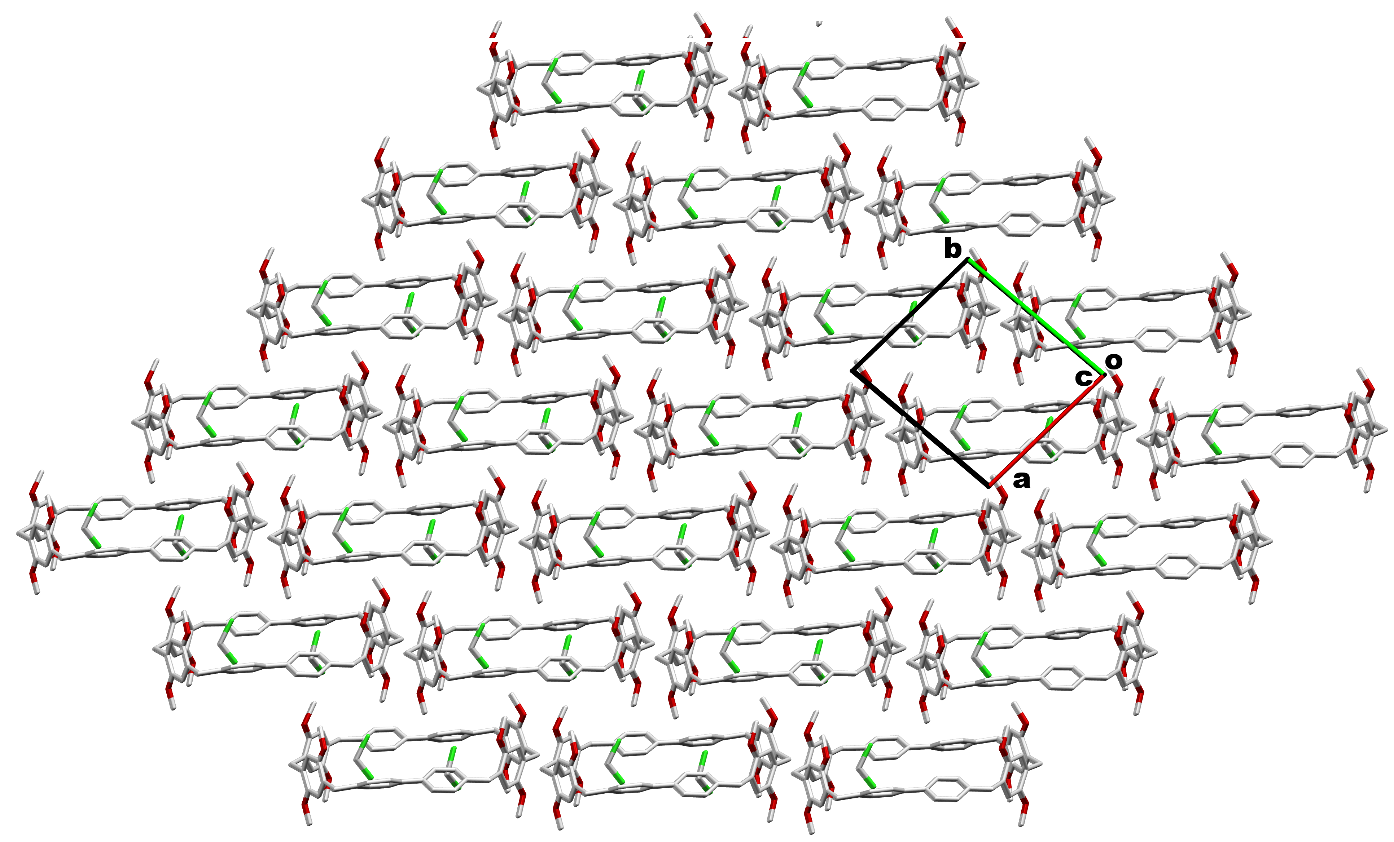


**Fig. S4**. Packing pattern of **BP8.2DCM** crystals.


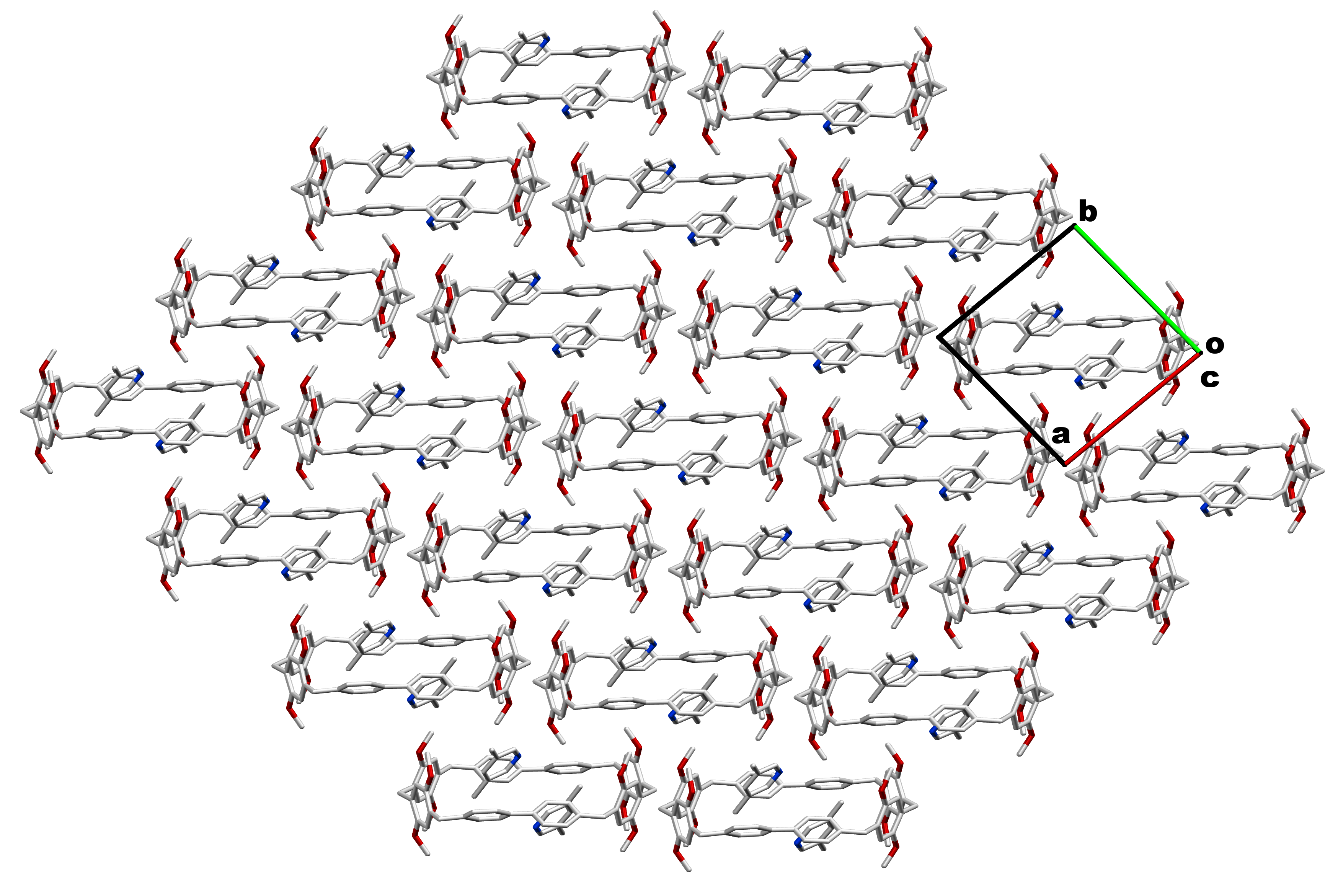


**Fig. S7**. Packing pattern of **BP8.2Lut** crystals.


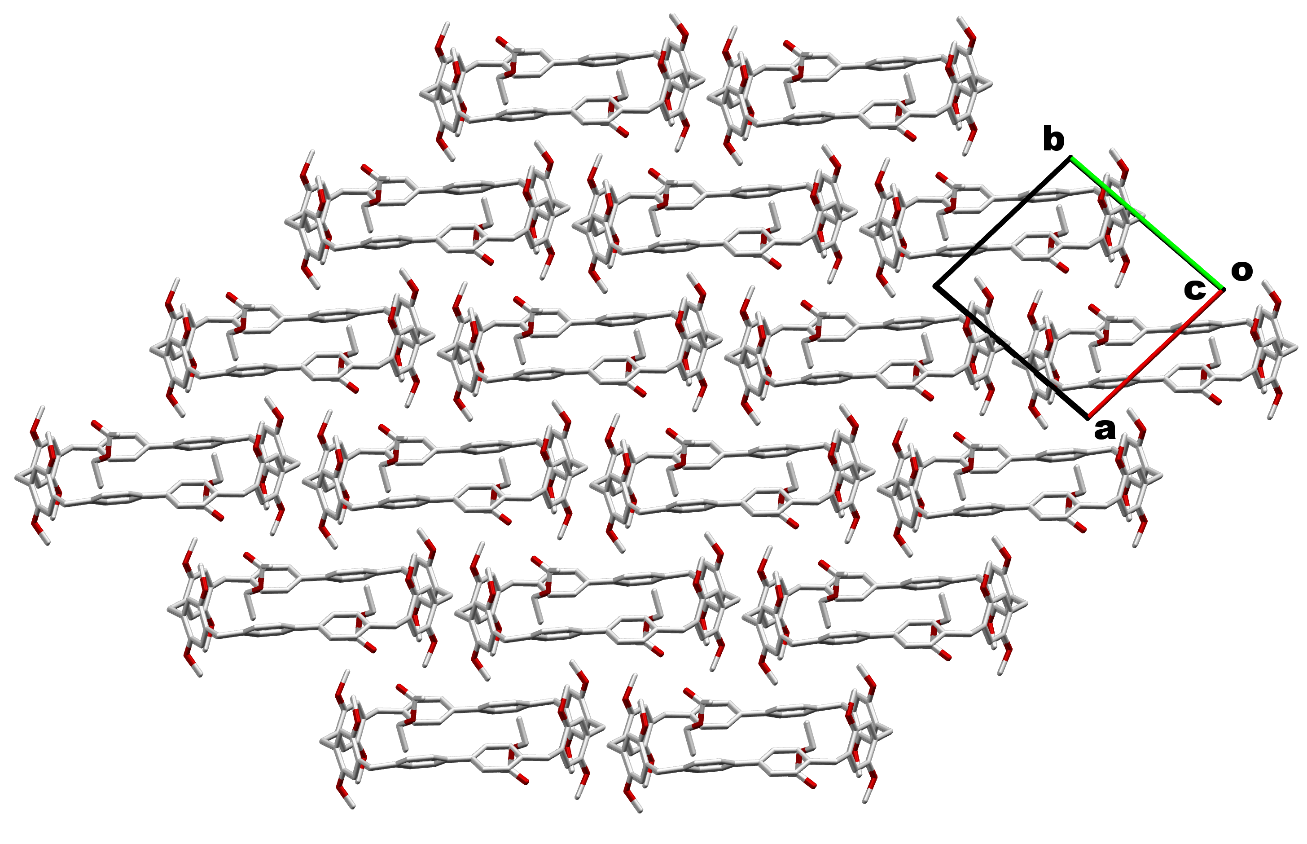


**Fig. S7**. Packing pattern of **BP8.2EtOAc** crystals.

|  |
| --- |
| **checkCIF_ BP8_2DCM**  chcheckCIF (basic structural check) running  ________________________________________  Checking for embedded fcf data in CIF ...  Found embedded fcf data in CIF. Extracting fcf data from uploaded CIF, please wait . .  checkCIF/PLATON (basic structural check)  ________________________________________  Structure factors have been supplied for datablock(s) BP8_2DCM  THIS REPORT IS FOR GUIDANCE ONLY. IF USED AS PART OF A REVIEW PROCEDURE FOR PUBLICATION, IT SHOULD NOT REPLACE THE EXPERTISE OF AN EXPERIENCED CRYSTALLOGRAPHIC REFEREE.  No syntax errors found. CIF dictionary  Please wait while processing .... Interpreting this report  Structure factor report  **Datablock: BP8_2DCM**   | | Bond precision: | C-C = 0.0063 A | Wavelength=0.71075 | | --- | --- | --- |  | Cell: | a=10.929(8) | b=12.083(8) | c=12.718(9) | | --- | --- | --- | --- | |  | alpha=74.983(9) | beta=72.896(10) | gamma=80.531(11) | | Temperature: | 293 K |  |  |  |  | Calculated | Reported | | --- | --- | --- | | Volume | 1543.3(19) | 1543.3(19) | | Space group | P -1 | P -1 | | Hall group | -P 1 | -P 1 | | Moiety formula | C62 H60 O8, 2(C H2 Cl2) | ? | | Sum formula | C64 H64 Cl4 O8 | C64 H64 Cl4 O8 | | Mr | 1102.95 | 1102.95 | | Dx,g cm-3 | 1.187 | 1.187 | | Z | 1 | 1 | | Mu (mm-1) | 0.243 | 0.243 | | F000 | 580.0 | 580.0 | | F000' | 580.83 |  | | h,k,lmax | 13,14,15 | 13,14,15 | | Nref | 5437 | 5202 | | Tmin,Tmax | 0.954,0.983 | 0.471,0.986 | | Tmin' | 0.953 |  |  | Correction method= # Reported T Limits: Tmin=0.471 Tmax=0.986 AbsCorr = MULTI-SCAN |  | | --- | --- |  | Data completeness= 0.957 | Theta(max)= 25.025 | | --- | --- |  | R(reflections)= 0.0804( 2180) | wR2(reflections)= 0.2675( 5202) | | --- | --- | | | S = 0.956 | Npar= 375 | | --- | --- | |  |   The following ALERTS were generated. Each ALERT has the format  **test-name_ALERT_alert-type_alert-level**.  Click on the hyperlinks for more details of the test.  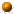**Alert level B**  [PLAT029_ALERT_3_B](javascript:makeHelpWindow(%22PLAT029.html%22)) _diffrn_measured_fraction_theta_full value Low . 0.957 Why?  **Response**: The structure crystallizes in the triclinic system, which requires a larger number of reflections for full completeness. The slightly low value of (_diffrn_measured_fraction_theta_full (0.957)) is due to weak high-angle reflections resulting from the limited diffraction quality of the crystal. Despite this, the dataset is adequate for reliable structure determination and refinement.  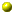**Alert level C**  [PLAT026_ALERT_3_C](javascript:makeHelpWindow(%22PLAT026.html%22)) Ratio Observed / Unique Reflections (too) Low .. 42% Check  [PLAT084_ALERT_3_C](javascript:makeHelpWindow(%22PLAT084.html%22)) High wR2 Value (i.e. > 0.25) ................... 0.27 Report  [PLAT220_ALERT_2_C](javascript:makeHelpWindow(%22PLAT220.html%22)) NonSolvent Resd 1 C Ueq(max)/Ueq(min) Range 3.2 Ratio  [PLAT242_ALERT_2_C](javascript:makeHelpWindow(%22PLAT242.html%22)) Low MainResAtom Ueq as Compared to Neighbours O3 Check  [PLAT260_ALERT_2_C](javascript:makeHelpWindow(%22PLAT260.html%22)) Large Average Ueq of Residue Including Cl1A 0.261 Check  [PLAT260_ALERT_2_C](javascript:makeHelpWindow(%22PLAT260.html%22)) Large Average Ueq of Residue Including Cl1B 0.295 Check  [PLAT340_ALERT_3_C](javascript:makeHelpWindow(%22PLAT340.html%22)) Low Bond Precision on C-C Bonds ............... 0.00632 Ang.  [PLAT906_ALERT_3_C](javascript:makeHelpWindow(%22PLAT906.html%22)) Large K Value in the Analysis of Variance ...... 38.356 Check  **And 2 other PLAT906 Alerts**  More ...  [PLAT910_ALERT_3_C](javascript:makeHelpWindow(%22PLAT910.html%22)) Missing FCF Reflection(s) Below Theta(Min)[Deg]= 3.18 Note  1 0 0, -1 1 0, 0 1 0, 1 1 0, 0 -1 1, -1 0 1,  0 0 1, 1 0 1, 0 1 1, 1 1 1,  [PLAT911_ALERT_3_C](javascript:makeHelpWindow(%22PLAT911.html%22)) Missing FCF Refl Between Thmin & STh/L= 0.595 225 Report  2 0 0, 0 2 0, 1 3 0, 1 4 0, 1 5 0, 1 6 0,  2 6 0, 1 7 0, 2 7 0, 3 7 0, 1 8 0, 2 8 0,  3 8 0, 2 9 0, 3 9 0, 4 9 0, 2 10 0, 3 10 0,  4 10 0, 5 10 0, 3 11 0, 4 11 0, 5 11 0, 6 11 0,  7 11 0, 8 11 0, -1 12 0, 3 12 0, 4 12 0, 5 12 0,  ( 195 More NOT listed: see .ckf listing file)  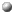**Alert level G**  [PLAT002_ALERT_2_G](javascript:makeHelpWindow(%22PLAT002.html%22)) Number of Distance or Angle Restraints on AtSite 6 Note  [PLAT003_ALERT_2_G](javascript:makeHelpWindow(%22PLAT003.html%22)) Number of Uiso or U(i,j) Restrained non-H-Atoms 6 Report  [PLAT175_ALERT_4_G](javascript:makeHelpWindow(%22PLAT175.html%22)) The CIF-Embedded .res File Contains SAME Records 1 Report  [PLAT177_ALERT_4_G](javascript:makeHelpWindow(%22PLAT177.html%22)) The CIF-Embedded .res File Contains DELU Records 1 Report  [PLAT178_ALERT_4_G](javascript:makeHelpWindow(%22PLAT178.html%22)) The CIF-Embedded .res File Contains SIMU Records 1 Report  [PLAT188_ALERT_3_G](javascript:makeHelpWindow(%22PLAT188.html%22)) A Non-default SIMU Restraint Value has been used 0.0200 Report  [PLAT199_ALERT_1_G](javascript:makeHelpWindow(%22PLAT199.html%22)) Reported _cell_measurement_temperature ..... (K) 293 Check  [PLAT200_ALERT_1_G](javascript:makeHelpWindow(%22PLAT200.html%22)) Reported _diffrn_ambient_temperature ..... (K) 293 Check  [PLAT302_ALERT_4_G](javascript:makeHelpWindow(%22PLAT302.html%22)) Anion/Solvent/Minor-Residue Disorder (Resd 2) 100% Note  [PLAT302_ALERT_4_G](javascript:makeHelpWindow(%22PLAT302.html%22)) Anion/Solvent/Minor-Residue Disorder (Resd 3) 100% Note  [PLAT304_ALERT_4_G](javascript:makeHelpWindow(%22PLAT304.html%22)) Non-Integer Number of Atoms in ..... (Resd 2) 3.75 Check  [PLAT304_ALERT_4_G](javascript:makeHelpWindow(%22PLAT304.html%22)) Non-Integer Number of Atoms in ..... (Resd 3) 1.25 Check  [PLAT860_ALERT_3_G](javascript:makeHelpWindow(%22PLAT860.html%22)) Number of Least-Squares Restraints ............. 63 Note  [PLAT883_ALERT_1_G](javascript:makeHelpWindow(%22PLAT883.html%22)) Absent Datum for _atom_sites_solution_primary .. Please Do !  [PLAT933_ALERT_2_G](javascript:makeHelpWindow(%22PLAT933.html%22)) Number of HKL-OMIT Records in Embedded .res File 3 Note  4 2 2, 2 0 0, 0 1 2,  [PLAT941_ALERT_3_G](javascript:makeHelpWindow(%22PLAT941.html%22)) Average HKL Measurement Multiplicity ........... 2.1 Low  [PLAT969_ALERT_5_G](javascript:makeHelpWindow(%22PLAT969.html%22)) The 'Henn et al.' R-Factor-gap value ........... 1.935 Note  Predicted wR2: Based on SigI**2 13.82 or SHELX Weight 27.96  [PLAT978_ALERT_2_G](javascript:makeHelpWindow(%22PLAT978.html%22)) Number C-C Bonds with Positive Residual Density. 0 Info  [PLAT994_ALERT_1_G](javascript:makeHelpWindow(%22PLAT994.html%22)) SHELXL .ins Contains no or MERG 0 Instruction .. ! Note  0 **ALERT level A** = Most likely a serious problem - resolve or explain  1 **ALERT level B** = A potentially serious problem, consider carefully  12 **ALERT level C** = Check. Ensure it is not caused by an omission or oversight  19 **ALERT level G** = General information/check it is not something unexpected  4 ALERT type 1 CIF construction/syntax error, inconsistent or missing data  8 ALERT type 2 Indicator that the structure model may be wrong or deficient  12 ALERT type 3 Indicator that the structure quality may be low  7 ALERT type 4 Improvement, methodology, query or suggestion  1 ALERT type 5 Informative message, check | | --- | --- | --- | --- | --- | --- | --- | --- | --- | --- | --- | --- | --- | --- | --- | --- | --- | --- | --- | --- | --- | --- | --- | --- | --- | --- | --- | --- | --- | --- | --- | --- | --- | --- | --- | --- | --- | --- | --- | --- | --- | --- | --- | --- | --- | --- | --- | --- | --- | --- | --- | --- | --- | --- | --- | --- | --- | --- | --- | --- | --- | --- | --- | --- | --- | --- | --- | --- | --- | --- | --- | --- | --- | --- | |

**checkCIF_ BP8.2Lut**

chcheckCIF (basic structural check) running

________________________________________

Checking for embedded fcf data in CIF ...

Found embedded fcf data in CIF. Extracting fcf data from uploaded CIF, please wait . .

checkCIF/PLATON (basic structural check)

________________________________________

Structure factors have been supplied for datablock(s) BP8_2Lut

THIS REPORT IS FOR GUIDANCE ONLY. IF USED AS PART OF A REVIEW PROCEDURE FOR PUBLICATION, IT SHOULD NOT REPLACE THE EXPERTISE OF AN EXPERIENCED CRYSTALLOGRAPHIC REFEREE.

No syntax errors found. CIF dictionary

Please wait while processing .... Interpreting this report

Structure factor report

**Datablock: BP8_2Lut**

| Bond precision: | C-C = 0.0054 A | Wavelength=0.71075 |
| --- | --- | --- |

| Cell: | a=11.4952(12) | b=11.5353(11) | c=13.4512(14) |
| --- | --- | --- | --- |
|  | alpha=72.721(5) | beta=69.872(5) | gamma=79.523(6) |
| Temperature: | 293 K |  |  |

|  | Calculated | Reported |
| --- | --- | --- |
| Volume | 1592.8(3) | 1592.8(3) |
| Space group | P -1 | P -1 |
| Hall group | -P 1 | -P 1 |
| Moiety formula | C62 H60 O8, 2(C7 H9 N) | ? |
| Sum formula | C76 H78 N2 O8 | C76 H78 N2 O8 |
| Mr | 1147.40 | 1147.40 |
| Dx,g cm-3 | 1.196 | 1.196 |
| Z | 1 | 1 |
| Mu (mm-1) | 0.077 | 0.077 |
| F000 | 612.0 | 612.0 |
| F000' | 612.27 |  |
| h,k,lmax | 13,13,16 | 13,13,15 |
| Nref | 5616 | 5476 |
| Tmin,Tmax | 0.985,0.992 | 0.536,0.991 |
| Tmin' | 0.985 |  |

| Correction method= # Reported T Limits: Tmin=0.536 Tmax=0.991 AbsCorr = MULTI-SCAN |  |
| --- | --- |

| Data completeness= 0.975 | Theta(max)= 25.016 |
| --- | --- |

| R(reflections)= 0.0748( 3221) | wR2(reflections)= 0.2382( 5476) |
| --- | --- |
| | S = 1.035 | Npar= 394 | | --- | --- | |  |

The following ALERTS were generated. Each ALERT has the format

**test-name_ALERT_alert-type_alert-level**.

Click on the hyperlinks for more details of the test.


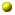
**Alert level C**

[PLAT029_ALERT_3_C](javascript:makeHelpWindow(%22PLAT029.html%22)) _diffrn_measured_fraction_theta_full value Low . 0.975 Why?

[PLAT242_ALERT_2_C](javascript:makeHelpWindow(%22PLAT242.html%22)) Low MainResAtom Ueq as Compared to Neighbours O4 Check

[PLAT243_ALERT_4_C](javascript:makeHelpWindow(%22PLAT243.html%22)) High MinorResAtom Ueq as Compared to Neighbours N1 Check

[PLAT243_ALERT_4_C](javascript:makeHelpWindow(%22PLAT243.html%22)) High MinorResAtom Ueq as Compared to Neighbours C32 Check

[PLAT244_ALERT_4_C](javascript:makeHelpWindow(%22PLAT244.html%22)) Low MinorResAtom Ueq as Compared to Neighbours C33 Check

[PLAT244_ALERT_4_C](javascript:makeHelpWindow(%22PLAT244.html%22)) Low MinorResAtom Ueq as Compared to Neighbours C35 Check

[PLAT260_ALERT_2_C](javascript:makeHelpWindow(%22PLAT260.html%22)) Large Average Ueq of Residue Including N1 0.129 Check

[PLAT340_ALERT_3_C](javascript:makeHelpWindow(%22PLAT340.html%22)) Low Bond Precision on C-C Bonds ............... 0.00543 Ang.

[PLAT906_ALERT_3_C](javascript:makeHelpWindow(%22PLAT906.html%22)) Large K Value in the Analysis of Variance ...... 19.932 Check

[PLAT906_ALERT_3_C](javascript:makeHelpWindow(%22PLAT906.html%22)) Large K Value in the Analysis of Variance ...... 3.290 Check

[PLAT910_ALERT_3_C](javascript:makeHelpWindow(%22PLAT910.html%22)) Missing FCF Reflection(s) Below Theta(Min)[Deg]= 3.17 Note

1 0 0, -1 1 0, 0 1 0, 1 1 0, 0 -1 1, -1 0 1,

0 0 1, 1 0 1, 0 1 1, 1 1 1,

[PLAT911_ALERT_3_C](javascript:makeHelpWindow(%22PLAT911.html%22)) Missing FCF Refl Between Thmin & STh/L= 0.595 129 Report

-1 2 0, -1 3 0, -2 4 0, -1 4 0, -2 5 0, -1 5 0,

-3 6 0, -2 6 0, -4 7 0, -3 7 0, -2 7 0, -4 8 0,

-3 8 0, -8 9 0, -4 9 0, 5-10 1, 4 -9 1, 5 -9 1,

3 -8 1, 4 -8 1, 5 -8 1, 8 -8 1, 2 -7 1, 3 -7 1,

4 -7 1, 5 -7 1, 2 -6 1, 3 -6 1, 4 -6 1, 1 -5 1,

( 99 More NOT listed: see .ckf listing file)


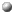
**Alert level G**

[PLAT199_ALERT_1_G](javascript:makeHelpWindow(%22PLAT199.html%22)) Reported _cell_measurement_temperature ..... (K) 293 Check

[PLAT200_ALERT_1_G](javascript:makeHelpWindow(%22PLAT200.html%22)) Reported _diffrn_ambient_temperature ..... (K) 293 Check

[PLAT883_ALERT_1_G](javascript:makeHelpWindow(%22PLAT883.html%22)) Absent Datum for _atom_sites_solution_primary .. Please Do !

[PLAT941_ALERT_3_G](javascript:makeHelpWindow(%22PLAT941.html%22)) Average HKL Measurement Multiplicity ........... 3.1 Low

[PLAT969_ALERT_5_G](javascript:makeHelpWindow(%22PLAT969.html%22)) The 'Henn et al.' R-Factor-gap value ........... 4.683 Note

Predicted wR2: Based on SigI**2 5.09 or SHELX Weight 23.01

[PLAT978_ALERT_2_G](javascript:makeHelpWindow(%22PLAT978.html%22)) Number C-C Bonds with Positive Residual Density. 2 Info

[PLAT992_ALERT_5_G](javascript:makeHelpWindow(%22PLAT992.html%22)) Repd & Actual _reflns_number_gt Values Differ by 2 Check

[PLAT994_ALERT_1_G](javascript:makeHelpWindow(%22PLAT994.html%22)) SHELXL .ins Contains no or MERG 0 Instruction .. ! Note

0 **ALERT level A** = Most likely a serious problem - resolve or explain

0 **ALERT level B** = A potentially serious problem, consider carefully

12 **ALERT level C** = Check. Ensure it is not caused by an omission or oversight

8 **ALERT level G** = General information/check it is not something unexpected

4 ALERT type 1 CIF construction/syntax error, inconsistent or missing data

3 ALERT type 2 Indicator that the structure model may be wrong or deficient

7 ALERT type 3 Indicator that the structure quality may be low

4 ALERT type 4 Improvement, methodology, query or suggestion

2 ALERT type 5 Informative message, check

|  |
| --- |
| **checkCIF_ BP8.2EtOAc**  chcheckCIF (basic structural check) running  ________________________________________  Checking for embedded fcf data in CIF ...  Found embedded fcf data in CIF. Extracting fcf data from uploaded CIF, please wait . .  checkCIF/PLATON (basic structural check)  ________________________________________  Structure factors have been supplied for datablock(s) BP8_2EtOAc  THIS REPORT IS FOR GUIDANCE ONLY. IF USED AS PART OF A REVIEW PROCEDURE FOR PUBLICATION, IT SHOULD NOT REPLACE THE EXPERTISE OF AN EXPERIENCED CRYSTALLOGRAPHIC REFEREE.  No syntax errors found. CIF dictionary  Please wait while processing .... Interpreting this report  Structure factor report  **Datablock: BP8_2EtOAc**   | Bond precision: | C-C = 0.0031 A | Wavelength=0.71075 | | --- | --- | --- |  | Cell: | a=11.1746(7) | b=11.9041(9) | c=12.9118(9) | | --- | --- | --- | --- | |  | alpha=74.735(5) | beta=71.166(5) | gamma=79.923(6) | | Temperature: | 293 K |  |  |  |  | Calculated | Reported | | --- | --- | --- | | Volume | 1560.6(2) | 1560.63(19) | | Space group | P -1 | P -1 | | Hall group | -P 1 | -P 1 | | Moiety formula | C62 H60 O8, 2(C4 H8 O2) | ? | | Sum formula | C70 H76 O12 | C70 H76 O12 | | Mr | 1109.31 | 1109.30 | | Dx,g cm-3 | 1.180 | 1.180 | | Z | 1 | 1 | | Mu (mm-1) | 0.080 | 0.080 | | F000 | 592.0 | 592.0 | | F000' | 592.29 |  | | h,k,lmax | 13,14,15 | 13,14,15 | | Nref | 5512 | 5326 | | Tmin,Tmax | 0.987,0.996 | 0.658,0.989 | | Tmin' | 0.984 |  |  | Correction method= # Reported T Limits: Tmin=0.658 Tmax=0.989 AbsCorr = MULTI-SCAN |  | | --- | --- |  | Data completeness= 0.966 | Theta(max)= 25.024 | | --- | --- |  | R(reflections)= 0.0629( 3372) | wR2(reflections)= 0.2002( 5326) | | --- | --- | | | S = 1.020 | Npar= 429 | | --- | --- | |  |   The following ALERTS were generated. Each ALERT has the format  **test-name_ALERT_alert-type_alert-level**.  Click on the hyperlinks for more details of the test.  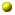**Alert level C**  [PLAT029_ALERT_3_C](javascript:makeHelpWindow(%22PLAT029.html%22)) _diffrn_measured_fraction_theta_full value Low . 0.966 Why?  [PLAT260_ALERT_2_C](javascript:makeHelpWindow(%22PLAT260.html%22)) Large Average Ueq of Residue Including O5A 0.179 Check  [PLAT260_ALERT_2_C](javascript:makeHelpWindow(%22PLAT260.html%22)) Large Average Ueq of Residue Including O5B 0.191 Check  [PLAT906_ALERT_3_C](javascript:makeHelpWindow(%22PLAT906.html%22)) Large K Value in the Analysis of Variance ...... 10.644 Check  [PLAT906_ALERT_3_C](javascript:makeHelpWindow(%22PLAT906.html%22)) Large K Value in the Analysis of Variance ...... 2.504 Check  [PLAT910_ALERT_3_C](javascript:makeHelpWindow(%22PLAT910.html%22)) Missing FCF Reflection(s) Below Theta(Min)[Deg]= 3.15 Note  1 0 0, -1 1 0, 0 1 0, 1 1 0, 0 -1 1, -1 0 1,  0 0 1, 1 0 1, 0 1 1, 1 1 1,  [PLAT911_ALERT_3_C](javascript:makeHelpWindow(%22PLAT911.html%22)) Missing FCF Refl Between Thmin & STh/L= 0.595 177 Report  2 1 1, -11 5 1, 0 1 2, 3 2 2, 12 6 2, 12 7 2,  4 2 3, 5 2 3, 13 2 3, 4 3 3, 5 3 3, 13 3 3,  13 4 3, 12 5 3, 12 6 3, 12 7 3, 11 8 3, 11 9 3,  10 10 3, 5 2 4, 13 2 4, 5 3 4, 6 3 4, 7 3 4,  8 3 4, 13 3 4, 5 4 4, 6 4 4, 7 4 4, 8 4 4,  ( 147 More NOT listed: see .ckf listing file)  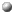**Alert level G**  [PLAT002_ALERT_2_G](javascript:makeHelpWindow(%22PLAT002.html%22)) Number of Distance or Angle Restraints on AtSite 12 Note  [PLAT003_ALERT_2_G](javascript:makeHelpWindow(%22PLAT003.html%22)) Number of Uiso or U(i,j) Restrained non-H-Atoms 12 Report  [PLAT172_ALERT_4_G](javascript:makeHelpWindow(%22PLAT172.html%22)) The CIF-Embedded .res File Contains DFIX Records 3 Report  [PLAT173_ALERT_4_G](javascript:makeHelpWindow(%22PLAT173.html%22)) The CIF-Embedded .res File Contains DANG Records 2 Report  [PLAT175_ALERT_4_G](javascript:makeHelpWindow(%22PLAT175.html%22)) The CIF-Embedded .res File Contains SAME Records 1 Report  [PLAT177_ALERT_4_G](javascript:makeHelpWindow(%22PLAT177.html%22)) The CIF-Embedded .res File Contains DELU Records 1 Report  [PLAT178_ALERT_4_G](javascript:makeHelpWindow(%22PLAT178.html%22)) The CIF-Embedded .res File Contains SIMU Records 1 Report  [PLAT188_ALERT_3_G](javascript:makeHelpWindow(%22PLAT188.html%22)) A Non-default SIMU Restraint Value has been used 0.0200 Report  [PLAT199_ALERT_1_G](javascript:makeHelpWindow(%22PLAT199.html%22)) Reported _cell_measurement_temperature ..... (K) 293 Check  [PLAT200_ALERT_1_G](javascript:makeHelpWindow(%22PLAT200.html%22)) Reported _diffrn_ambient_temperature ..... (K) 293 Check  [PLAT302_ALERT_4_G](javascript:makeHelpWindow(%22PLAT302.html%22)) Anion/Solvent/Minor-Residue Disorder (Resd 2) 100% Note  [PLAT302_ALERT_4_G](javascript:makeHelpWindow(%22PLAT302.html%22)) Anion/Solvent/Minor-Residue Disorder (Resd 3) 100% Note  [PLAT304_ALERT_4_G](javascript:makeHelpWindow(%22PLAT304.html%22)) Non-Integer Number of Atoms in ..... (Resd 2) 7.20 Check  [PLAT304_ALERT_4_G](javascript:makeHelpWindow(%22PLAT304.html%22)) Non-Integer Number of Atoms in ..... (Resd 3) 6.80 Check  [PLAT380_ALERT_4_G](javascript:makeHelpWindow(%22PLAT380.html%22)) Incorrectly? Oriented X(sp2)-Methyl Moiety ..... C32A Check  [PLAT398_ALERT_2_G](javascript:makeHelpWindow(%22PLAT398.html%22)) Deviating C-O-C Angle From 120 for O6B . 106.9 Degree  [PLAT790_ALERT_4_G](javascript:makeHelpWindow(%22PLAT790.html%22)) Centre of Gravity not Within Unit-Cell: Resd. # 2 Note  C4 H8 O2  [PLAT790_ALERT_4_G](javascript:makeHelpWindow(%22PLAT790.html%22)) Centre of Gravity not Within Unit-Cell: Resd. # 3 Note  C4 H8 O2  [PLAT860_ALERT_3_G](javascript:makeHelpWindow(%22PLAT860.html%22)) Number of Least-Squares Restraints ............. 191 Note  [PLAT883_ALERT_1_G](javascript:makeHelpWindow(%22PLAT883.html%22)) Absent Datum for _atom_sites_solution_primary .. Please Do !  [PLAT933_ALERT_2_G](javascript:makeHelpWindow(%22PLAT933.html%22)) Number of HKL-OMIT Records in Embedded .res File 1 Note  0 1 2,  [PLAT941_ALERT_3_G](javascript:makeHelpWindow(%22PLAT941.html%22)) Average HKL Measurement Multiplicity ........... 2.8 Low  [PLAT969_ALERT_5_G](javascript:makeHelpWindow(%22PLAT969.html%22)) The 'Henn et al.' R-Factor-gap value ........... 3.965 Note  Predicted wR2: Based on SigI**2 5.05 or SHELX Weight 19.62  [PLAT978_ALERT_2_G](javascript:makeHelpWindow(%22PLAT978.html%22)) Number C-C Bonds with Positive Residual Density. 2 Info  [PLAT994_ALERT_1_G](javascript:makeHelpWindow(%22PLAT994.html%22)) SHELXL .ins Contains no or MERG 0 Instruction .. ! Note  0 **ALERT level A** = Most likely a serious problem - resolve or explain  0 **ALERT level B** = A potentially serious problem, consider carefully  7 **ALERT level C** = Check. Ensure it is not caused by an omission or oversight  25 **ALERT level G** = General information/check it is not something unexpected  4 ALERT type 1 CIF construction/syntax error, inconsistent or missing data  7 ALERT type 2 Indicator that the structure model may be wrong or deficient  8 ALERT type 3 Indicator that the structure quality may be low  12 ALERT type 4 Improvement, methodology, query or suggestion  1 ALERT type 5 Informative message, check |
